# Supplementary material for: Eugenol mimics exercise to promote skeletal muscle fiber remodeling and myokine IL-15 expression by activating TRPV1 channel
Source: eLife journal article supplement (doi:10.7554/elife.90724), 2023-11-07

# Con

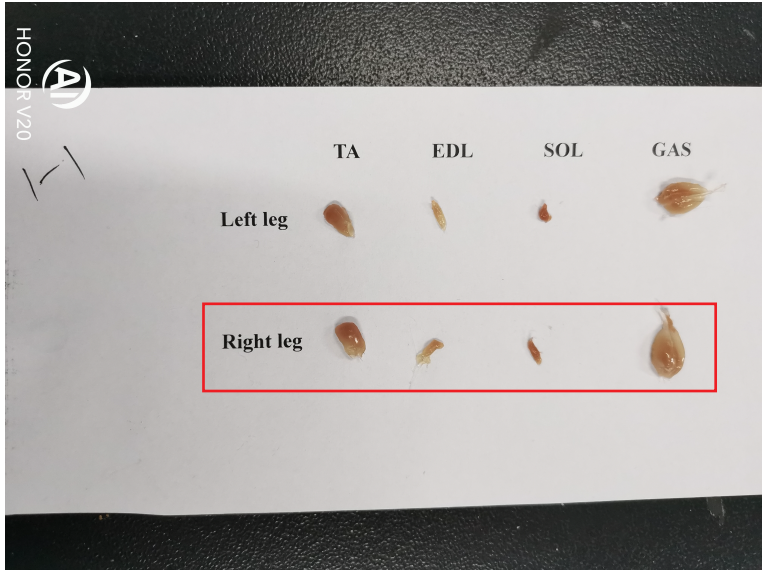

# EUG50

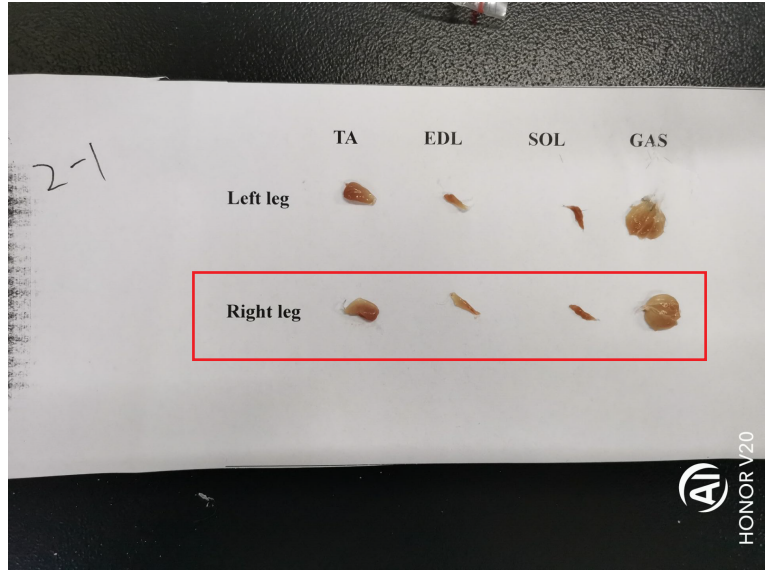

# EUG100

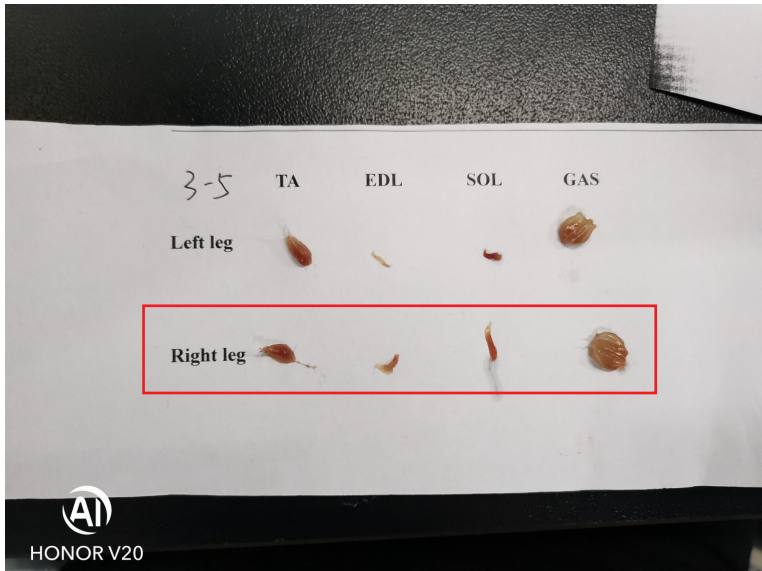

# EUG200

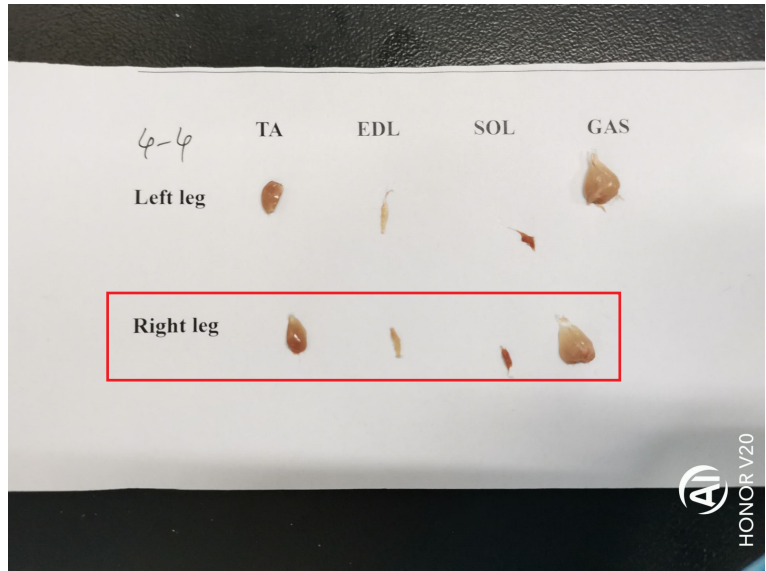

Supplement: fig1-data3 [file elife-90724-fig1-data3-v1.pdf]
