# Supplementary material for: Eugenol mimics exercise to promote skeletal muscle fiber remodeling and myokine IL-15 expression by activating TRPV1 channel
Source: eLife journal article supplement (doi:10.7554/elife.90724), 2023-11-07

## Figure 4H

TA muscle  
nuclear protein

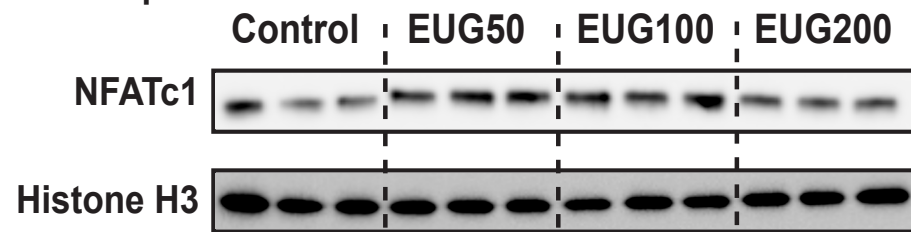

NFATc1

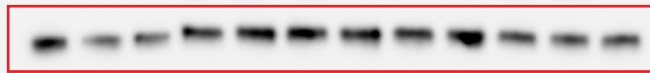

Histone H3

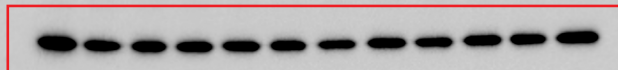

Supplement: fig4-data13 [file elife-90724-fig4-data13-v1.pdf]
