# Supplementary material for: Eugenol mimics exercise to promote skeletal muscle fiber remodeling and myokine IL-15 expression by activating TRPV1 channel
Source: eLife journal article supplement (doi:10.7554/elife.90724), 2023-11-07

**Figure 4I**

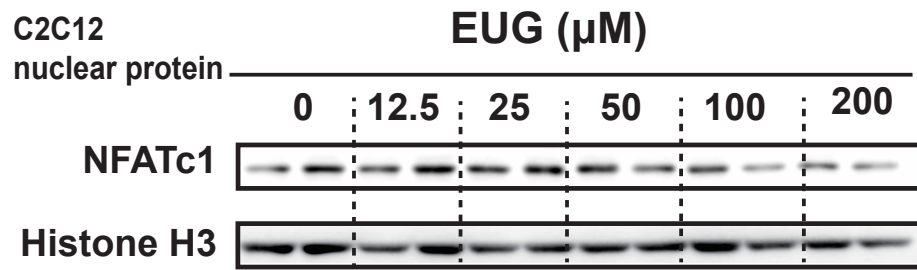

**NFATc1**

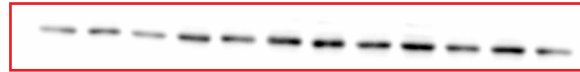

**Histone H3**

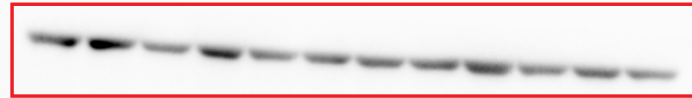

Supplement: fig4-data15 [file elife-90724-fig4-data15-v1.pdf]
