# Supplementary material for: Eugenol mimics exercise to promote skeletal muscle fiber remodeling and myokine IL-15 expression by activating TRPV1 channel
Source: eLife journal article supplement (doi:10.7554/elife.90724), 2023-11-07

**Figure 7-figure supplement 1C**

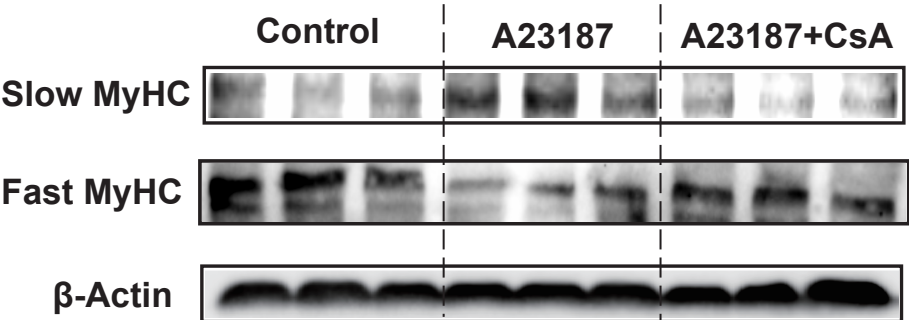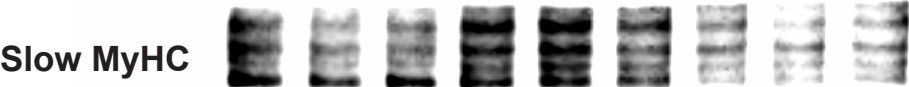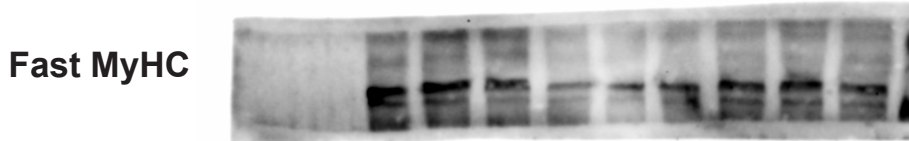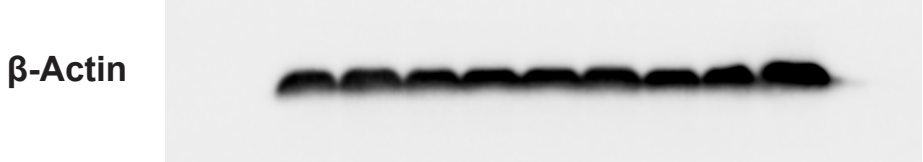

Supplement: fig7-figsupp1-data5 [file elife-90724-fig7-figsupp1-data5-v1.pdf]
