# Supplementary material for: Eugenol mimics exercise to promote skeletal muscle fiber remodeling and myokine IL-15 expression by activating TRPV1 channel
Source: eLife. 2024 Jun 24;12:RP90724. doi: 10.7554/eLife.90724 (PMC11196110; doi:10.7554/eLife.90724)
Supplement: Figure 1—figure supplement 1—source data 1. [file elife-90724-fig1-figsupp1-data1.xlsx]

## Sheet: Sheet1
C2C12 cell viability (Relative values)
0 μM	12.5 μM	25 μM	50 μM	100 μM	200 μM	400 μM	800 μM	1600 μM
1.6129	1.5703	1.5779	1.6098	1.3109	1.192	1.3022	0.9788	0.77
1.3805	1.8112	1.5019	1.2389	1.7422	1.6916	1.6676	1.2267	1.2465
1.7642	1.5775	1.4799	1.612	1.3566	1.2952	1.3023	1.1045	0.8799
1.4919	1.5682	1.4379	1.3713	1.4349	1.3808	1.5739	1.1573	1.0756
1.5474	1.5882	1.328	1.6	1.8502	1.5149	1.2696	1.2747	0.9324
