# Supplementary material for: Eugenol mimics exercise to promote skeletal muscle fiber remodeling and myokine IL-15 expression by activating TRPV1 channel
Source: eLife. 2024 Jun 24;12:RP90724. doi: 10.7554/eLife.90724 (PMC11196110; doi:10.7554/eLife.90724)
Supplement: Figure 1—source data 1. [file elife-90724-fig1-data1.xlsx]

## Sheet: 分组程序
初始序号	体重	编号（体重由大到小排序）		编号	区组	随机数	备用栏	体重	初始序号	注明	备用栏
7	16.99	1		1	1	0.0331938	D	16.99	7	①Rand程序生成随机数，复制后粘贴到原位置	A		A-1
12	16.74	2		2	1	0.641652	B	16.74	12	②对随机数排序之后再对区组进行升序	A		B-2
43	16.56	3		3	1	0.822115	A	16.56	43	③建立分组，将备用栏粘贴到分组栏【区组为分组几倍，就有几个重复字母】	B		C-3
6	16.55	4		4	1	0.120993	C	16.55	6		B		D-4
16	16.46	5		5	1	0.388409	B	16.46	16	④对编号进行升序	C
15	16.45	6		6	1	0.0553182	C	16.45	15	⑤进行单因素方差分析，体重无差异即可	C
40	16.41	7		7	1	0.925693	A	16.41	40		D
45	16.39	8		8	1	0.0517297	D	16.39	45		D
76	16.37	9		9	2	0.84417	B	16.37	76		A
34	16.33	10		10	2	0.742134	B	16.33	34		A
28	16.31	11		11	2	0.887584	A	16.31	28		B
67	16.29	12		12	2	0.166189	D	16.29	67		B
50	16.27	13		13	2	0.302189	C	16.27	50		C
75	16.23	14		14	2	0.920944	A	16.23	75		C
78	16.23	15		15	2	0.1354	D	16.23	78		D
27	16.22	16		16	2	0.675765	C	16.22	27		D
38	16.17	17		17	3	0.0555875	D	16.17	38		A
41	16.17	18		18	3	0.655554	B	16.17	41		A
57	16.16	19		19	3	0.737082	A	16.16	57		B
22	16.15	20		20	3	0.216509	C	16.15	22		B
14	16.13	21		21	3	0.96394	A	16.13	14		C
46	16.09	22		22	3	0.403465	B	16.09	46		C
52	16.03	23		23	3	0.317673	C	16.03	52		D
1	16.01	24		24	4	0.384804	C	16.01	1		D
26	16	25		25	4	0.191984	C	16	26		A
32	15.99	26		26	4	0.562113	B	15.99	32		A
47	15.94	27		27	4	0.103245	D	15.94	47		B
19	15.88	28		28	4	0.00700303	D	15.88	19		B
37	15.87	29		29	4	0.716098	A	15.87	37		C
66	15.84	30		30	4	0.768974	A	15.84	66		C
29	15.82	31		31	4	0.892403	D	15.82	29		D
39	15.79	32		32	4	0.638188	B	15.79	39		D
4	15.77	33		33	5	0.934991	A	15.77	4		A
36	15.7	34		34	5	0.77346	A	15.7	36		A
68	15.69	35		35	5	0.747378	B	15.69	68		B
25	15.68	36		36	5	0.0503746	D	15.68	25		B
11	15.64	37		37	5	0.581561	C	15.64	11		C
79	15.61	38		38	5	0.335401	C	15.61	79		C
44	15.6	39		39	5	0.631788	B	15.6	44		D
30	15.59	40		40	5	0.0305228	D	15.59	30		D
3	15.54	41		41	6	0.513225	C	15.54	3		A
69	15.52	42		42	6	0.239539	D	15.52	69		A
20	15.49	43		43	6	0.57982	C	15.49	20		B
23	15.49	44		44	6	0.230137	D	15.49	23		B
18	15.48	45		45	6	0.768994	B	15.48	18		C
70	15.46	46		46	6	0.826017	B	15.46	70		C
59	15.42	47		47	6	0.979904	A	15.42	59		D
65	15.42	48		48	6	0.960189	A	15.42	65		D
55	15.41	49		49	7	0.872371	A	15.41	55		A
31	15.39	50		50	7	0.447902	C	15.39	31		A
58	15.39	51		51	7	0.570696	B	15.39	58		B
82	15.38	52		52	7	0.523386	C	15.38	82		B
5	15.37	53		53	7	0.858905	A	15.37	5		C
13	15.37	54		54	7	0.717428	B	15.37	13		C
9	15.34	55		55	7	0.0502043	D	15.34	9		D
73	15.34	56		56	7	0.0978994	D	15.34	73		D
21	15.29	57		57	8	0.353093	C	15.29	21		A
64	15.27	58		58	8	0.564425	B	15.27	64		A
17	15.22	59		59	8	0.106538	D	15.22	17		B
54	15.22	60		60	8	0.995121	A	15.22	54		B
24	15.21	61		61	8	0.254117	D	15.21	24		C
74	15.17	62		62	8	0.339521	C	15.17	74		C
63	15.1	63		63	8	0.982478	A	15.1	63		D
49	15.09	64		64	8	0.559404	B	15.09	49		D
60	15.09	65		65	9	0.971343	A	15.09	60		A
61	15.01	66		66	9	0.0668554	D	15.01	61		A
42	14.97	67		67	9	0.626361	B	14.97	42		B
8	14.93	68		68	9	0.938345	A	14.93	8		B
56	14.93	69		69	9	0.0126461	D	14.93	56		C
35	14.92	70		70	9	0.23022	C	14.92	35		C
62	14.92	71		71	9	0.263396	C	14.92	62		D
10	14.91	72		72	9	0.778347	B	14.91	10		D
33	14.8	73		73	10	0.919478	A	14.8	33		A
77	14.74	74		74	10	0.607774	B	14.74	77		A
81	14.7	75		75	10	0.340212	C	14.7	81		B
83	14.68	76		76	10	0.647835	A	14.68	83		B
53	14.67	77		77	10	0.579509	B	14.67	53		C
48	14.6	78		78	10	0.0767495	D	14.6	48		C
80	14.6	79		79	10	0.242686	D	14.6	80		D
72	14.36	80		80	10	0.554545	C	14.36	72		D
2，51，71

## Sheet: 第一周ADG
T1	4.6	T1	2.95	T1	3.75	T1	3.17	T1	2.51	T1	5.13	T1	5.05	T1	3.61	T1	4.06	T1	2.89	T1	2.6	T1	4.32	T1	4.15	T1	3.62	T1	4.4	T1	6.11	T1	3.99	T1	3.91	T1	3.99	T1	4.41
T2	3.2	T2	2.28	T2	3.69	T2	2.69	T2	3.23	T2	2.77	T2	2.73	T2	3.9	T2	1.61	T2	2.28	T2	3.4	T2	3.85	T2	5.31	T2	3.63	T2	5.1	T2	5.52	T2	2.88	T2	4.18	T2	3.02	T2	5.6
T3	2.76	T3	4.05	T3	2.51	T3	4.11	T3	4.2	T3	2.99	T3	3.34	T3	3.63	T3	3.36	T3	3.66	T3	5.04	T3	2.48	T3	3.33	T3	2.04	T3	5.01	T3	4.01	T3	4.92	T3	4.58	T3	4.4	T3	3.8
T4	1.84	T4	4.96	T4	3.91	T4	2	T4	4.12	T4	4.09	T4	3.19	T4	4.01	T4	4.54	T4	2.79	T4	4.8	T4	3.74	T4	6.33	T4	1.46	T4	3.62	T4	4.29	T4	4.18	T4	4.16	T4	2.23	T4	5.16
1	T1	3.961	0.2324	A
2	T4	3.771	0.2324	A
3	T3	3.711	0.2324	A
4	T2	3.5435	0.2324	A
			adg
	15.77	20.37	4.6
	15.37	18.32	2.95
	14.93	18.68	3.75
	16.13	19.3	3.17
	16.31	18.82	2.51
	14.8	19.93	5.13
	15.7	20.75	5.05
	15.87	19.48	3.61
	16.41	20.47	4.06
	16.56	19.45	2.89
	15.22	17.82	2.6
	15.41	19.73	4.32
	16.16	20.31	4.15
	15.42	19.04	3.62
	15.09	19.49	4.4
	15.1	21.21	6.11
	15.42	19.41	3.99
	15.84	19.75	3.91
	16.23	20.22	3.99
	14.68	19.09	4.41
			0
	14.91	18.11	3.2
	16.74	19.02	2.28
	15.37	19.06	3.69
	16.46	19.15	2.69
	15.48	18.71	3.23
	15.99	18.76	2.77
	16.33	19.06	2.73
	15.79	19.69	3.9
	16.17	17.78	1.61
	14.97	17.25	2.28
	15.6	19	3.4
	16.09	19.94	3.85
	15.09	20.4	5.31
	14.67	18.3	3.63
	15.39	20.49	5.1
	15.27	20.79	5.52
	15.69	18.57	2.88
	15.46	19.64	4.18
	16.37	19.39	3.02
	14.74	20.34	5.6
			0
	16.01	18.77	2.76
	15.54	19.59	4.05
	16.55	19.06	2.51
	15.64	19.75	4.11
	16.45	20.65	4.2
	15.49	18.48	2.99
	15.29	18.63	3.34
	16.15	19.78	3.63
	16	19.36	3.36
	16.22	19.88	3.66
	15.39	20.43	5.04
	14.92	17.4	2.48
	16.27	19.6	3.33
	16.03	18.07	2.04
	14.92	19.93	5.01
	14.36	18.37	4.01
	15.17	20.09	4.92
	15.61	20.19	4.58
	14.7	19.1	4.4
	15.38	19.18	3.8
			0
	16.99	18.83	1.84
	15.34	20.3	4.96
	15.22	19.13	3.91
	15.88	17.88	2
	15.49	19.61	4.12
	15.21	19.3	4.09
	15.68	18.87	3.19
	15.82	19.83	4.01
	15.59	20.13	4.54
	16.17	18.96	2.79
	16.39	21.19	4.8
	15.94	19.68	3.74
	14.6	20.93	6.33
	14.93	16.39	1.46
	15.01	18.63	3.62
	16.29	20.58	4.29
	15.52	19.7	4.18
	15.34	19.5	4.16
	16.23	18.46	2.23
	14.6	19.76	5.16

## Sheet: 前三周
25	26.11	27.73	78.84	T1	78.84	T1	71.21	T1	73.83	T1	75.87	T1	73.98	T1	74.54	T1	87.13	T1	71.29	T1	80.21	T1	77.67	T1	72.37	T1	71.14	T1	85.65	T1	73.93	T1	71.63	T1	74.56	T1	70.71	T1	79.28	T1	78.2	T1	79.79
23.82	23.66	23.73	71.21	T2	68.01	T2	82.18	T2	76.14	T2	75.53	T2	88.93	T2	76.63	T2	83.11	T2	72.5	T2	77.93	T2	72.87	T2	76.23	T2	83.42	T2	83.74	T2	100.83	T2	80.97	T2	82.74	T2	80.12	T2	73.99	T2	78.99	T2	81.43
25.34	22.74	25.75	73.83	T3	77.73	T3	82.09	T3	106.9	T3	98.45	T3	93.98	T3	87.26	T3	71.97	T3	80.58	T3	86.08	T3	104.47	T3	83.34	T3	84.55	T3	99.41	T3	92.72	T3	76.04	T3	77.97	T3	87.26	T3	94.73	T3	81.31	T3	95.46
26.01	23.88	25.98	75.87	T4	79.78	T4	74.82	T4	72.07	T4	98.53	T4	99.56	T4	88.59	T4	80.81	T4	74.89	T4	82	T4	77.72	T4	87.49	T4	84.26	T4	88.37	T4	93.91	T4	82.43	T4	78.76	T4	75.83	T4	83.79	T4	92.27	T4	88.12
24.52	23.86	25.6	73.98
25.15	24.73	24.66	74.54
28.1	28.33	30.7	87.13
24.9	22.89	23.5	71.29
26.36	27.31	26.54	80.21
24.76	26.03	26.88	77.67
22.87	24.2	25.3	72.37
26.5	19.13	25.51	71.14
28.85	27.78	29.02	85.65
25.91	22.24	25.78	73.93
24.15	23.98	23.5	71.63
26.05	24.18	24.33	74.56
24.18	23.09	23.44	70.71
27.95	25.45	25.88	79.28
26.48	24.86	26.86	78.2
26.11	26.46	27.22	79.79
			0
24.44	21.58	21.99	68.01
27.63	27.42	27.13	82.18
26.46	23.84	25.84	76.14
26.68	25	23.85	75.53
25.71	29.72	33.5	88.93
26.06	24.26	26.31	76.63
27.64	28.47	27	83.11
25.23	24	23.27	72.5
27.32	24.48	26.13	77.93
23.79	24.9	24.18	72.87
25.97	26.31	23.95	76.23
27.62	27.35	28.45	83.42
28.5	26.19	29.05	83.74
29.26	34.68	36.89	100.83
27.93	26.84	26.2	80.97
28.43	25.51	28.8	82.74
28.55	26.43	25.14	80.12
25.56	23.4	25.03	73.99
26.22	26.09	26.68	78.99
27.84	26.4	27.19	81.43
			0
27.23	25.12	25.38	77.73
27.41	27.69	26.99	82.09
27.53	35.98	43.39	106.9
29.82	33.06	35.57	98.45
31.13	29.77	33.08	93.98
28.16	28.93	30.17	87.26
17.9	26.41	27.66	71.97
27.05	25.49	28.04	80.58
28.27	28.78	29.03	86.08
29.89	35.21	39.37	104.47
28.25	28.14	26.95	83.34
27.01	28.51	29.03	84.55
30.77	31.12	37.52	99.41
30.78	30.62	31.32	92.72
26.18	25.11	24.75	76.04
26.66	22.68	28.63	77.97
31.45	28.07	27.74	87.26
28.19	28.69	37.85	94.73
26.38	25.11	29.82	81.31
31.03	30.7	33.73	95.46
			0
26.2	26.98	26.6	79.78
26.92	24	23.9	74.82
25.31	23	23.76	72.07
29.41	31.45	37.67	98.53
29.46	35.17	34.93	99.56
28.38	29.94	30.27	88.59
25.33	24.5	30.98	80.81
26.65	24.11	24.13	74.89
29.35	26.84	25.81	82
25.32	25.08	27.32	77.72
30.77	27.62	29.1	87.49
28.73	26.46	29.07	84.26
30.16	27.95	30.26	88.37
34.01	29.38	30.52	93.91
27.39	27.71	27.33	82.43
28.84	25.94	23.98	78.76
26.12	23.5	26.21	75.83
28	28.2	27.59	83.79
33.92	30	28.35	92.27
25.08	31.47	31.57	88.12

## Sheet: Sheet3
1-11	22.87
1-2	23.82
1-15	24.15
1-17	24.18
1-5	24.52
1-10	24.76
1-8	24.9
1-1	25
1-6	25.15
1-3	25.34
1-14	25.91
1-4	26.01
1-16	26.05
1-20	26.11
1-9	26.36
1-19	26.48
1-12	26.5
1-18	27.95
1-7	28.1
1-13	28.85
2-10	23.79
2-1	24.44
2-8	25.23
2-18	25.56
2-5	25.71
2-11	25.97
2-6	26.06
2-19	26.22
2-3	26.46
2-4	26.68
2-9	27.32
2-12	27.62
2-2	27.63
2-7	27.64
2-20	27.84
2-15	27.93
2-16	28.43
2-13	28.5
2-17	28.55
2-14	29.26
3-7	17.9
3-15	26.18
3-19	26.38
3-16	26.66
3-12	27.01
3-8	27.05
3-1	27.23
3-2	27.41
3-3	27.53
3-6	28.16
3-18	28.19
3-11	28.25
3-9	28.27
3-4	29.82
3-10	29.89
3-13	30.77
3-14	30.78
3-20	31.03
3-5	31.13
3-17	31.45
4-20	25.08
4-3	25.31
4-10	25.32
4-7	25.33
4-17	26.12
4-1	26.2
4-8	26.65
4-2	26.92
4-15	27.39
4-18	28
4-6	28.38
4-12	28.73
4-16	28.84
4-9	29.35
4-4	29.41
4-5	29.46
4-13	30.16
4-11	30.77
4-19	33.92
4-14	34.01

## Sheet: Body weight
The body weight of the mice (g)
Group	Number	Week0	Week1	Week2	Week3	Week4
Con	1-1	15.77	20.37	22.23	23.53	24.26
	1-2	15.37	18.32	19.52	20.73	21.51
	1-3	14.93	18.68	20.13	21.32	22.01
	1-4	16.13	19.3	19.92	21.37	21.89
	1-5	16.31	18.82	20.13	20.85	21.44
	1-6	14.8	19.93	20.99	21.81	22.87
	1-7	15.7	20.75	20.85	21.06	21.79
	1-8	15.87	19.48	20.23	20.83	20.8
	1-9	16.41	20.47	21.32	22.49	22.98
	1-10	16.56	19.45	19.92	20.73	21.61
	1-11	15.22	17.82	19.67	20.69	21.74
	1-12	15.41	19.73	20.61	21.88	22.7
	1-13	16.16	20.31	21.39	22.38	22.78
	1-14	15.42	19.04	19.23	20.65	21.31
	1-15	15.09	19.49	21.02	21.95	22.4
	1-16	15.1	21.21	22.66	23.77	24.48
	1-17	15.42	19.41	20.82	22	23.1
	1-18	15.84	19.75	20.66	21.66	21.8
	1-19	16.23	20.22	21.36	22.19	22.68
	1-20	14.68	19.09	19.94	21.1	21.79
EUG50	2-1	14.91	18.11	18.77	19.83	20.72
	2-2	16.74	19.02	19.55	20.85	20.82
	2-3	15.37	19.06	20.65	21.84	22.41
	2-4	16.46	19.15	20.47	21.39	22.38
	2-5	15.48	18.71	19.1	19.58	22.07
	2-6	15.99	18.76	20.34	20.81	21.46
	2-7	16.33	19.06	20.46	21.1	21.45
	2-8	15.79	19.69	20.95	21.68	22.27
	2-9	16.17	17.78	18.61	19.45	19.8
	2-10	14.97	17.25	18.66	19.75	19.82
	2-11	15.6	19	20.02	21.19	21.95
	2-12	16.09	19.94	21.45	22.59	22.38
	2-13	15.09	20.4	21.16	22.08	23.15
	2-14	14.67	18.3	20.6	21.79	22.83
	2-15	15.39	20.49	22.09	22.95	23.94
	2-16	15.27	20.79	21.09	22.24	22.85
	2-17	15.69	18.57	19.45	20.27	21.4
	2-18	15.46	19.64	21.25	22.38	22.58
	2-19	16.37	19.39	20.71	22.08	22.68
	2-20	14.74	20.34	20.95	21.53	22.48
EUG100	3-1	16.01	18.77	20.02	21	21.33
	3-2	15.54	19.59	21.35	22.06	22.82
	3-3	16.55	19.06	19.85	20.65	21.62
	3-4	15.64	19.75	20.4	20.7	21.07
	3-5	16.45	20.65	21.62	22.33	23.26
	3-6	15.49	18.48	19.82	20.79	21.08
	3-7	15.29	18.63	19.46	20.23	20.84
	3-8	16.15	19.78	21.37	22.27	22.91
	3-9	16	19.36	20.43	20.89	21.67
	3-10	16.22	19.88	20.82	21.53	22.49
	3-11	15.39	20.43	21.41	22.47	23.62
	3-12	14.92	17.4	18.27	19.07	19.57
	3-13	16.27	19.6	20.05	20.98	21.19
	3-14	16.03	18.07	18.77	19.43	20.32
	3-15	14.92	19.93	21.64	22.29	22.67
	3-16	14.36	18.37	20.23	20.57	17.31
	3-17	15.17	20.09	21.36	22.03	22.74
	3-18	15.61	20.19	21.89	23.26	23.07
	3-19	14.7	19.1	20.03	20.93	21.45
	3-20	15.38	19.18	20.06	20.89	21.7
EUG200	4-1	16.99	18.83	20.12	21.16	21.84
	4-2	15.34	20.3	21.06	22.14	22.48
	4-3	15.22	19.13	19.78	20.73	21.64
	4-4	15.88	17.88	18.94	19.69	20.44
	4-5	15.49	19.61	20.52	21.15	21.74
	4-6	15.21	19.3	20.01	20.39	21
	4-7	15.68	18.87	19.71	20.44	20.16
	4-8	15.82	19.83	20.84	21.66	22.08
	4-9	15.59	20.13	20.84	21.61	22.47
	4-10	16.17	18.96	19.85	20.49	21.29
	4-11	16.39	21.19	22.28	23.48	24.03
	4-12	15.94	19.68	20.32	20.87	21.15
	4-13	14.6	20.93	21.57	22.86	23.4
	4-14	14.93	16.39	18.13	19.06	19.84
	4-15	15.01	18.63	20.35	21.32	22.05
	4-16	16.29	20.58	21.69	18.55	22.89
	4-17	15.52	19.7	20.43	21.68	21.87
	4-18	15.34	19.5	20.44	21.38	21.56
	4-19	16.23	18.46	19.52	20.84	21.46
	4-20	14.6	19.76	20.62	21.38	22.21

## Sheet: 肌肉SAS
TA
T1	1.85903	T1	1.72478	T1	1.57649	T1	1.55662	T1	1.73015	T1	1.86538	T1	1.56223	T1	1.01805	T1	1.56854	T1	1.67527	T1	1.78922	T1	1.35931	T1	1.38991	T1	2.04222
T2	1.71332	T2	1.29683	T2	1.51911	T2	1.64103	T2	1.71717	T2	1.72553	T2	1.65011	T2	1.6601	T2	1.77527	T2	1.6105	T2	1.69159	T2	1.77148	T2	1.59612	T2	1.65036
T3	1.45925	T3	1.4523	T3	1.49613	T3	1.09108	T3	1.62668	T3	2.0777	T3	1.93864	T3	1.64268	T3	1.78334	T3	1.99311	T3	1.54389	T3	2.62276	T3	1.32366	T3	1.80754
T4	2.02847	T4	1.70254	T4	1.82381	T4	1.51786	T4	1.63496	T4	1.61994	T4	1.88821	T4	1.56055	T4	1.6974	T4	1.31624	T4	1.89012	T4	1.69506	T4	1.7288	T4	2.16119
SOL
T1	0.206101	T1	0.227801	T1	0.0699627	T1	0.214254	T1	0.252409	T1	0.115385	T1	0.130548	T1	0.273022	T1	0.147194	T1	0.220554	T1	0.253268	T1	0.147186	T1	0.110092	T1	0.454337
T2	0.0627413	T2	0.177714	T2	0.153774	T2	0.0932401	T2	0.19697	T2	0.216953	T2	0.25054	T2	0.205869	T2	0.208855	T2	0.153173	T2	0.200935	T2	0.132861	T2	0.167549	T2	0.24911
T3	0.188431	T3	0.10916	T3	0.124678	T3	0.118596	T3	0.0479846	T3	0.178961	T3	0.120053	T3	0.224386	T3	0.137966	T3	0.260827	T3	0.0926334	T3	0.207972	T3	0.145119	T3	0.169051
T4	0.191281	T4	0.122309	T4	0.12381	T4	0.0595238	T4	0.0679348	T4	0.293725	T4	0.164396	T4	0.216396	T4	0.307329	T4	0.299145	T4	0.246976	T4	0.218436	T4	0.28425	T4	0.234129
GAS
T1	5.2432	T1	4.84891	T1	4.73414	T1	4.87538	T1	4.9564	T1	6.00481	T1	5.396	T1	5.44655	T1	5.1196	T1	5.03989	T1	5.40441	T1	4.09957	T1	4.5	T1	4.67187
T2	4.17471	T2	5.76849	T2	5.03262	T2	5.01166	T2	5.49495	T2	4.28355	T2	5.71922	T2	5.77749	T2	5.39683	T2	5.33917	T2	5.41121	T2	4.03454	T2	5.55556	T2	5.50712
T3	5.52585	T3	5.56241	T3	4.84953	T3	4.26945	T3	4.92802	T3	4.25578	T3	5.58026	T3	5.24132	T3	5.71794	T3	5.24114	T3	5.15218	T3	6.39515	T3	5.05717	T3	5.19289
T4	5.65391	T4	5.88063	T4	4.40952	T4	4.04762	T4	5.5163	T4	4.84201	T4	5.44387	T4	6.15065	T4	5.74941	T4	5.61538	T4	5.11089	T4	5.46964	T4	4.24977	T4	5.74966
EDL
T1	0.370981	T1	0.162715	T1	0.177239	T1	0.29296	T1	0.256999	T1	0.192308	T1	0.0652742	T1	0.115687	T1	0.349586	T1	0.258095	T1	0.224673	T1	0.12987	T1	0.211009	T1	0.31207
T2	0.188224	T2	0.288184	T2	0.181733	T2	0.0699301	T2	0.176768	T2	0.312815	T2	0.267819	T2	0.087604	T2	0.284043	T2	0.258206	T2	0.149533	T2	0.221435	T2	0.277778	T2	0.200178
T3	0.297984	T3	0.289511	T3	0.0773861	T3	0.218216	T3	0.239923	T3	0.178961	T3	0.168964	T3	0.14818	T3	0.270823	T3	0.216535	T3	0.0882223	T3	0.462161	T3	0.0659631	T3	0.338101
T4	0.231317	T4	0.136986	T4	0.109524	T4	0.173611	T4	0.394022	T4	0.315977	T4	0.248943	T4	0.162297	T4	0.321513	T4	0.0854701	T4	0.15625	T4	0.148536	T4	0.242311	T4	0.225124
