# Supplementary material for: Eugenol mimics exercise to promote skeletal muscle fiber remodeling and myokine IL-15 expression by activating TRPV1 channel
Source: eLife. 2024 Jun 24;12:RP90724. doi: 10.7554/eLife.90724 (PMC11196110; doi:10.7554/eLife.90724)
Supplement: Figure 1—source data 2. [file elife-90724-fig1-data2.xlsx]

## Sheet: Skeletal muscle weight
Group	Number	Left leg skeletal muscle weight/Body weight (mg/g)
		TA	EDL	SOL	GAS
Control	1-1	1.859	0.371	0.2061	5.2432
	1-2	1.7248	0.1627	0.2278	4.8489
	1-5	1.5765	0.1772	0.07	4.7341
	1-6	1.5566	0.293	0.2143	4.8754
	1-7	1.7302	0.257	0.2524	4.9564
	1-8	1.8654	0.1923	0.1154	6.0048
	1-9	1.5622	0.0653	0.1305	5.396
	1-10	1.018	0.1157	0.273	5.4466
	1-11	1.5685	0.3496	0.1472	5.1196
	1-14	1.6753	0.2581	0.2206	5.0399
	1-16	1.7892	0.2247	0.2533	5.4044
	1-17	1.3593	0.1299	0.1472	4.0996
	1-18	1.3899	0.211	0.1101	4.5
	1-20	2.0422	0.3121	0.4543	4.6719
EUG50	2-1	1.7133	0.1882	0.0627	4.1747
	2-2	1.2968	0.2882	0.1777	5.7685
	2-6	1.5191	0.1817	0.1538	5.0326
	2-7	1.641	0.0699	0.0932	5.0117
	2-9	1.7172	0.1768	0.197	5.4949
	2-10	1.7255	0.3128	0.217	4.2836
	2-13	1.6501	0.2678	0.2505	5.7192
	2-14	1.6601	0.0876	0.2059	5.7775
	2-15	1.7753	0.284	0.2089	5.3968
	2-16	1.6105	0.2582	0.1532	5.3392
	2-17	1.6916	0.1495	0.2009	5.4112
	2-18	1.7715	0.2214	0.1329	4.0345
	2-19	1.5961	0.2778	0.1675	5.5556
	2-20	1.6504	0.2002	0.2491	5.5071
EUG100	3-2	1.4592	0.298	0.1884	5.5259
	3-4	1.4523	0.2895	0.1092	5.5624
	3-5	1.4961	0.0774	0.1247	4.8495
	3-6	1.0911	0.2182	0.1186	4.2694
	3-7	1.6267	0.2399	0.048	4.928
	3-8	2.0777	0.179	0.179	4.2558
	3-10	1.9386	0.169	0.1201	5.5803
	3-11	1.6427	0.1482	0.2244	5.2413
	3-12	1.7833	0.2708	0.138	5.7179
	3-14	1.9931	0.2165	0.2608	5.2411
	3-15	1.5439	0.0882	0.0926	5.1522
	3-16	2.6228	0.4622	0.208	6.3951
	3-17	1.3237	0.066	0.1451	5.0572
	3-18	2.0285	0.3381	0.1691	5.1929
EUG200	4-2	1.7025	0.2313	0.1913	5.6539
	4-4	1.8238	0.137	0.1223	5.8806
	4-6	1.5179	0.1095	0.1238	4.4095
	4-7	1.635	0.1736	0.0595	4.0476
	4-8	1.6199	0.394	0.0679	5.5163
	4-9	1.8882	0.316	0.2937	4.842
	4-10	1.5605	0.2489	0.1644	5.4439
	4-11	1.6974	0.1623	0.2164	6.1506
	4-12	1.6581	0.3215	0.3073	5.7494
	4-13	1.8901	0.0855	0.2991	5.6154
	4-14	1.3456	0.1563	0.247	5.1109
	4-16	1.7288	0.1485	0.2184	5.4696
	4-19	2.6114	0.2423	0.2842	4.2498
	4-20	3.8721	0.2251	0.2341	5.7497
