# Supplementary material for: Eugenol mimics exercise to promote skeletal muscle fiber remodeling and myokine IL-15 expression by activating TRPV1 channel
Source: eLife. 2024 Jun 24;12:RP90724. doi: 10.7554/eLife.90724 (PMC11196110; doi:10.7554/eLife.90724)
Supplement: Figure 1—source data 10. [file elife-90724-fig1-data10.xlsx]

## Sheet: The mRNA expression
Group	Number	The relative mRNA expression in GAS muscle (Average2-ΔΔCt)					Group	Number	The relative mRNA expression in TA muscle (Average2-ΔΔCt)
		Myh7	Myh2	Myh1	Myh4				Myh7	Myh2	Myh1	Myh4
Control	1-1	0.68	0.86	0.99	1.04		Control	1-1	1.27	1.03	0.95	1.37
	1-2	1.01	0.92	0.85	1.25			1-2	0.54	1.12	0.96	1.01
	1-3	1.19	1.24	1.26	1.25			1-3	1.26	1.16	0.95	0.88
	1-4	1.13	0.98	0.91	ND			1-4	0.59	0.94	1.17	0.81
	1-5	0.7	0.62	0.99	0.82			1-5	1.36	0.9	1.12	1.07
	1-6	1.29	1.38	ND	0.64			1-6	0.98	0.86	0.84	0.86
EUG50	2-1	1.64	1.66	0.91	0.6		EUG50	2-1	2.95	2.34	1.33	1
	2-2	2.69	0.8	1.4	0.88			2-2	2.55	2.07	1.02	0.83
	2-3	1.16	2.71	0.73	0.59			2-3	2.16	2.89	1.64	ND
	2-4	2.39	1.66	2.34	0.29			2-4	2.65	1.9	1.39	0.44
	2-5	1.97	1.04	1.6	0.72			2-5	2.58	1.63	1.48	0.59
	2-6	ND	2.36	ND	0.65			2-6	ND	2.56	1.18	0.43
EUG100	3-1	4.44	4.91	2.05	0.82		EUG100	3-1	1.93	1.25	1.02	0.67
	3-2	1.97	2.32	1.41	0.35			3-2	5.11	1.27	1.45	0.74
	3-3	4.56	2.49	1.92	0.8			3-3	1.81	1.95	1.16	0.82
	3-4	5.71	4.66	3.82	0.57			3-4	1.9	2.21	1.19	0.83
	3-5	3.08	4.78	1.82	0.67			3-5	5.1	ND	0.67	0.64
	3-6	2.72	2.33	2.33	0.53			3-6	5.2	1.29	1.23	ND
EUG200	4-1	1.25	1.69	0.82	0.34		EUG200	4-1	1.86	1.57	1.14	0.69
	4-2	2.15	2.13	1.45	0.4			4-2	1.5	1.12	1.03	0.74
	4-3	1	0.91	0.89	0.47			4-3	1.19	1.8	1.17	0.48
	4-4	1.54	0.88	0.73	0.32			4-4	0.98	ND	1.15	0.92
	4-5	1.59	1.01	0.94	0.49			4-5	2.25	1.66	0.83	0.7
	4-6	1.55	1.51	0.92	0.58			4-6	1.55	1.26	1.57	0.7
