# Supplementary material for: Eugenol mimics exercise to promote skeletal muscle fiber remodeling and myokine IL-15 expression by activating TRPV1 channel
Source: eLife. 2024 Jun 24;12:RP90724. doi: 10.7554/eLife.90724 (PMC11196110; doi:10.7554/eLife.90724)
Supplement: Figure 1—source data 11. [file elife-90724-fig1-data11.xlsx]

## Sheet: The mRNA expression
Group	Number	The relative mRNA expression in C2C12 (Average2-ΔΔCt)
		Myh7	Myh2	Myh1	Myh4
0 μM	1-1	1.06	1.07	1.16	1.33
	1-2	0.96	0.85	0.93	0.9
	1-3	0.82	1.06	0.88	0.96
	1-4	1.17	1.01	1.04	0.81
12.5 μM	2-1	1.52	1.9	0.96	0.77
	2-2	1.31	1.7	1.11	0.83
	2-3	1.37	1.67	0.88	0.7
	2-4	0.88	1.76	0.67	0.57
25 μM	3-1	1.07	2.14	0.67	0.59
	3-2	1.63	2.23	1.08	0.94
	3-3	1.39	1.3	0.91	0.58
	3-4	1.43	1.36	0.77	0.82
50 μM	4-1	1.5	2.27	0.76	0.73
	4-2	1.32	1.84	0.75	0.47
	4-3	1.6	2.06	0.78	0.45
	4-4	1.26	3.05	0.7	0.6
100 μM	5-1	1.25	2.13	0.87	0.46
	5-2	1.76	2.08	0.95	0.87
	5-3	1.34	2.08	0.94	0.71
	5-4	1.84	1.76	0.9	0.65
200 μM	6-1	1.32	1.13	0.74	0.89
	6-2	1.15	0.87	0.77	1.09
	6-3	1.61	1.23	0.75	1.19
	6-4	1.54	1.25	0.94	0.97
