# Supplementary material for: Eugenol mimics exercise to promote skeletal muscle fiber remodeling and myokine IL-15 expression by activating TRPV1 channel
Source: eLife. 2024 Jun 24;12:RP90724. doi: 10.7554/eLife.90724 (PMC11196110; doi:10.7554/eLife.90724)
Supplement: Figure 2—source data 2. [file elife-90724-fig2-data2.xlsx]

## Sheet: Sheet1
	GAS muscle (U/mg protein)			TA muscle (U/mg protein)
	LDH	SDH	MDH	LDH	SDH	MDH
Control	592.785	37.9499	4.85806	3212.93	40.1329	2.47219
	778.194	64.8311	1.27844	3607.44	36.3107	7.10754
	595.396	88.5498	2.55687	3459.11	45.8662	2.47219
	616.288	82.2248	5.88081	3623.22	53.5106	2.78121
	626.733	66.4123	7.67063	3560.1	38.2218	9.88875
	663.293	72.7373	7.67063	3676.88	53.5106	1.23609
EUG50	412.246	100.688	4.40952	2031.39	30.2044	4.21039
	467.674	98.5907	3.73113	1928.19	36.4536	5.89455
	474.603	104.884	11.8718	1905.83	33.329	6.3998
	585.459	146.837	5.7663	1842.19	NA	4.54722
	585.459	127.958	17.9773	1797.47	49.9935	4.88405
	488.46	102.786	3.73113	1192	49.9935	1.85257
EUG100	256.173	92.0478	8.26896	1997.65	114.438	12.7975
	363.146	109.094	12.1278	2063	129.411	10.3764
	306.844	80.1157	7.44207	2070.07	62.0316	4.3235
	287.139	121.026	7.7177	2119.52	52.406	9.33875
	275.878	100.571	6.8908	2096.56	83.4218	27.8433
	337.81	92.0478	20.1212	2207.84	47.0585	7.95523
EUG200	537.946	82.2248	9.20475	1689.92	58.0368	0.493924
	566.671	45.8561	8.43769	1817.72	75.3461	4.11603
	566.671	37.9499	7.92631	1810.99	34.6185	3.62211
	608.453	50.5999	7.15925	1774	64.146	2.7989
	587.562	60.0874	8.69338	1767.27	61.0914	3.12819
	611.065	50.5999	5.62513	1814.35	67.2005	1.64641
