# Supplementary material for: Eugenol mimics exercise to promote skeletal muscle fiber remodeling and myokine IL-15 expression by activating TRPV1 channel
Source: eLife. 2024 Jun 24;12:RP90724. doi: 10.7554/eLife.90724 (PMC11196110; doi:10.7554/eLife.90724)
Supplement: Figure 2—source data 3. [file elife-90724-fig2-data3.xlsx]

## Sheet: Sheet 1
	The heatmap for the mRNA expression of transcription factors controling mitochondrial biogenesis in GAS muscle
	Con-1	Con-2	Con-3	Con-4	EUG100-1	EUG100-2	EUG100-3	EUG100-4
Pgc1a	1.33926	0.906683	0.961789	0.792269	3.42622	3.8349	2.77699	2.79133
Nrf1	1.06456	1.01637	1.07881	0.840265	1.83333	1.85957	2.17089	3.09783
Nrf2	1.2761	1.53961	0.558105	0.62619	1.56039	0.795079	1.01286	1.17384
Polrmt	1.84039	0.889912	0.526782	0.742914	1.73468	1.39966	1.54929	2.04396
Tfam	0.719713	1.5723	1.08039	0.627597	1.05207	2.70137	2.06565	2.74421
Tfb1M	0.813292	1.14332	1.6795	0.363882	0.754686	2.42508	0.766947	0.899954
Tfb2M	0.775738	0.89161	1.78341	0.549243	1.24687	3.67827	1.97816	1.63482
	The heatmap for the mRNA expression of genes encoding mitochondrial complex components in GAS muscle
	Con-1	Con-2	Con-3	Con-4	EUG100-1	EUG100-2	EUG100-3	EUG100-4
Ndufa	1.18509	0.833756	1.10523	0.875926	2.2159	2.19548	2.83162	1.56503
Ndufb3	0.757171	1.05461	1.44768	0.740541	3.12642	4.40275	3.70594	1.16817
Ndufs8	1.05014	1.2336	1.23394	0.482317	1.40109	3.98828	1.07009	1.38413
Sdha	1.07042	1.33622	0.761116	0.832239	2.5508	1.81612	2.86486	2.702
Sdhb	0.63741	1.35531	1.14138	0.865895	2.7715	3.19787	2.99057	0.865495
Sdhc	1.06571	1.0327	1.20206	0.699538	1.91468	2.4382	1.56701	1.65938
Uqcrb	0.946303	0.981331	1.40589	0.666479	2.4874	4.25515	2.44218	1.4359
Uqcrc1	0.693834	0.944492	0.97874	1.38293	4.47751	2.73607	2.11946	1.97624
Uqcrq	1.0861	0.911943	1.15091	0.851051	2.21488	1.83144	2.10546	1.4361
Cox5b	0.658211	1.05025	1.49558	0.795951	4.50305	2.87418	3.3164	1.55111
Cox6a1	0.653058	1.10685	1.52211	0.717982	3.12191	3.70002	1.88825	1.32988
Cox7a	1.01042	0.722629	1.62964	0.637312	1.67661	2.06058	1.82851	0.785785
Atp5a1	1.24927	1.36315	0.540015	0.847564	2.52106	1.78421	2.10396	2.06607
Atb5b	0.511016	1.7973	0.740599	0.951079	2.2901	1.74986	1.20537	1.60428
Atp5g1	0.662408	1.29938	1.40606	0.632152	1.42145	3.69617	2.03128	1.33132
