# Supplementary material for: Eugenol mimics exercise to promote skeletal muscle fiber remodeling and myokine IL-15 expression by activating TRPV1 channel
Source: eLife. 2024 Jun 24;12:RP90724. doi: 10.7554/eLife.90724 (PMC11196110; doi:10.7554/eLife.90724)
Supplement: Figure 2—source data 6. [file elife-90724-fig2-data6.xlsx]

## Sheet: Sheet1
	mtDNA copy number in muscles
	GAS muscle	TA muscle
Control	0.95	1.16
	1.24	0.94
	0.76	0.59
	1.44	0.99
	0.71	0.54
	0.9	1.8
EUG100	1.42	1.83
	2	2.11
	1.87	1.61
	1.67	2.5
	1.66	1.79
	1.85	2.78
