# Supplementary material for: Eugenol mimics exercise to promote skeletal muscle fiber remodeling and myokine IL-15 expression by activating TRPV1 channel
Source: eLife. 2024 Jun 24;12:RP90724. doi: 10.7554/eLife.90724 (PMC11196110; doi:10.7554/eLife.90724)
Supplement: Figure 2—source data 7. [file elife-90724-fig2-data7.xlsx]

## Sheet: Sheet1
0 μM	12.5 μM	25 μM	50 μM	100 μM	200 μM
0.67	3.05	3.8	5.04	6.87	1.04
1.1	4.5	3.06	5.63	6.93	2.07
1.06	5.15	3.94	5.92	7.94	2.49
1.17	4.59	4.25	6.08	4.68	3.25
