# Supplementary material for: Eugenol mimics exercise to promote skeletal muscle fiber remodeling and myokine IL-15 expression by activating TRPV1 channel
Source: eLife. 2024 Jun 24;12:RP90724. doi: 10.7554/eLife.90724 (PMC11196110; doi:10.7554/eLife.90724)
Supplement: Figure 3—source data 1. [file elife-90724-fig3-data1.xlsx]

## Sheet: Sheet1
Control			EUG50			EUG100			EUG200
Number	ADF(g)	ADF/ADG	Number	ADF(g)	ADF/ADG	Number	ADF(g)	ADF/ADG	Number	ADF(g)	ADF/ADG
1-1	3.80929	12.563	2-1	3.1975	15.4096	3-1	3.69143	19.4286	4-1	3.7625	21.7217
1-2	3.41071	15.5538	2-2	3.72071	25.5343	3-2	3.79857	14.6099	4-2	3.6	14.1176
1-3	3.55464	14.0579	2-3	3.61321	14.3707	3-3	5.42071	29.9369	4-3	3.37429	14.7165
1-4	3.57964	17.401	2-4	3.57714	16.9189	3-4	5.00821	25.8251	4-4	4.78643	29.3904
1-5	3.56821	19.4756	2-5	4.16571	17.6995	3-5	4.675	19.2217	4-5	4.69857	21.0496
1-6	3.56786	12.3792	2-6	3.61393	18.4991	3-6	4.09536	20.5134	4-6	4.53571	21.9344
1-7	4.27429	19.6519	2-7	4.03821	22.084	3-7	3.51607	17.7387	4-7	4.20643	26.2902
1-8	3.37679	19.1785	2-8	3.36036	14.5201	3-8	3.83214	15.8728	4-8	3.52214	15.754
1-9	3.7725	16.0776	2-9	3.66714	28.2865	3-9	4.19357	20.709	4-9	3.80464	15.484
1-10	3.7025	20.5287	2-10	3.51393	20.2866	3-10	5.45571	24.3636	4-10	3.82286	20.9062
1-11	3.5175	15.1058	2-11	3.60107	15.8787	3-11	3.9175	13.3281	4-11	4.17357	15.2958
1-12	3.56786	13.7037	2-12	3.95643	17.6121	3-12	4.01786	24.1935	4-12	4.10357	22.0537
1-13	4.08714	17.287	2-13	4.02179	13.9715	3-13	4.66286	26.5366	4-13	4.18857	13.3273
1-14	3.46071	16.4516	2-14	4.85679	16.6654	3-14	4.3375	28.31	4-14	4.38714	25.0183
1-15	3.41607	13.0848	2-15	3.78536	12.3965	3-15	3.62214	13.0864	4-15	3.94821	15.7031
1-16	3.51536	10.4936	2-16	3.95143	14.5963	3-16	3.68036	34.9322	4-16	3.87071	16.4212
1-17	3.36393	12.2643	2-17	3.73964	18.338	3-17	4.10429	15.181	4-17	3.67214	16.1921
1-18	3.66929	17.2383	2-18	3.55179	13.9677	3-18	4.305	16.1582	4-18	3.95643	17.8103
1-19	3.715	16.1271	2-19	3.7	16.4184	3-19	3.9075	16.2089	4-19	4.2475	22.74
1-20	3.78	14.8861	2-20	3.87679	14.0245	3-20	4.59536	20.3592	4-20	4.34036	15.9698
