# Supplementary material for: Eugenol mimics exercise to promote skeletal muscle fiber remodeling and myokine IL-15 expression by activating TRPV1 channel
Source: eLife. 2024 Jun 24;12:RP90724. doi: 10.7554/eLife.90724 (PMC11196110; doi:10.7554/eLife.90724)
Supplement: Figure 3—source data 2. [file elife-90724-fig3-data2.xlsx]

## Sheet: Sheet1
Group	Number	Fat/Body weight (mg/g)
		BAT	gWAT	iWAT
Control	1-1	2.1558	13.5037	2.47633
	1-2	2.3803	7.9358	2.2548
	1-5	1.903	8.0504	2.08112
	1-6	2.3481	9.75401	2.80416
	1-7	2.2992	11.4686	2.3818
	1-8	3.6154	9.68468	2.9327
	1-9	2.9112	9.9565	2.2977
	1-10	2.2304	9.4863	2.9986
	1-11	2.5253	9.4756	3.3533
	1-14	2.4589	12.4152	3.03839
	1-16	3.0106	11.5278	2.594
	1-17	2.1039	9.0433	2.4978
	1-18	2.3899	7.9495	2.2018
	1-20	3.1849	7.50609	2.4598
EUG50	2-1	3.2239	3.1892	0.888
	2-2	4.4044	2.9031	2.0413
	2-6	5.4054	7.4779	1.4958
	2-7	3.1049	9.4848	3.1422
	2-9	3.9444	8.8648	2.1717
	2-10	2.3865	6.91892	1.7356
	2-13	3.067	8.1822	1.8618
	2-14	3.272	8.79077	1.55055
	2-15	2.1679	5.29496	1.33868
	2-16	3.0941	9.7056	2.75424
	2-17	3.7757	7.39535	2.5374
	2-18	3.3747	9.8148	2.65652
	2-19	3.7434	9.8043	1.8651
	2-20	1.9662	9.8043	2.7625
EUG100	3-2	2.1648	10.0613	1.3804
	3-4	3.4884	7.3402	2.1405
	3-5	3.5985	3.6887	1.94476
	3-6	4.2932	2.8463	2.24819
	3-7	2.4424	7.3848	2.3608
	3-8	3.4265	8.99979	2.5447
	3-10	4.1663	9.6443	2.0987
	3-11	2.5529	10.4234	1.9263
	3-12	2.3965	3.29612	1.7617
	3-14	2.4459	9.6654	2.76535
	3-15	3.3172	9.8853	2.8011
	3-16	2.3108	7.3657	2.1259
	3-17	2.2427	5.4178	1.8997
	3-18	2.4274	7.9239	2.5401
EUG200	4-2	4.0347	3.4475	2.8425
	4-4	6.2769	3.9041	2.5098
	4-6	4.6619	4.0476	2.6476
	4-7	2.9613	10.1247	2.85155
	4-8	2.6313	9.55867	2.5181
	4-9	2.0383	4.82622	2.0249
	4-10	3.4382	8.201	2.35541
	4-11	3.2043	8.1814	2.5635
	4-12	4.1513	7.669	2.36664
	4-13	2.094	4.93043	2.0342
	4-14	3.251	8.4425	2.253
	4-16	2.7392	10.4412	2.1276
	4-19	4.1845	10.452	2.6561
	4-20	3.8721	8.8158	2.1064
