# Supplementary material for: Eugenol mimics exercise to promote skeletal muscle fiber remodeling and myokine IL-15 expression by activating TRPV1 channel
Source: eLife. 2024 Jun 24;12:RP90724. doi: 10.7554/eLife.90724 (PMC11196110; doi:10.7554/eLife.90724)
Supplement: Figure 3—source data 3. [file elife-90724-fig3-data3.xlsx]

## Sheet: Sheet1
	The level of T-CHO, LDL, and HDL (mM)
	T-CHO	LDL	HDL
EUG0	3.5052	1.26007	2.18805
	4.63674	1.3152	2.13351
	4.30183	1.82711	2.51533
	5.48215	ND	2.05442
	4.18152	1.18526	2.41715
	4.42539	1.66172	1.39715
	6.48689	1.48846	1.5226
	3.62875	ND	0.835327
EUG50	3.51495	1.14982	1.39715
	3.02721	1.06713	2.41715
	2.74433	1.26401	2.46896
	3.33611	1.33883	1.53078
	3.3166	0.559158	2.16351
	4.36036	1.64597	1.92624
	3.39464	1.26795	2.14987
	3.70029	1.36639	1.87169
EUG100	3.40765	0.948993	2.67896
	3.78808	1.15769	3.35805
	3.87262	1.72079	1.72714
	2.81586	1.14588	2.01896
	3.60599	ND	3.16169
	ND	1.15769	2.3926
	3.97667	1.00018	2.02442
	4.6595	1.35852	1.99987
EUG200	3.26133	0.90174	2.20715
	2.3769	0.811172	2.9926
	4.3506	1.26795	3.08533
	3.64176	1.10256	2.37624
	3.97017	1.31126	2.83169
	4.26606	1.17738	3.30351
	3.84986	1.37427	3.58442
	3.4044	1.14588	2.35169
