# Supplementary material for: Eugenol mimics exercise to promote skeletal muscle fiber remodeling and myokine IL-15 expression by activating TRPV1 channel
Source: eLife. 2024 Jun 24;12:RP90724. doi: 10.7554/eLife.90724 (PMC11196110; doi:10.7554/eLife.90724)
Supplement: Figure 3—source data 5. [file elife-90724-fig3-data5.xlsx]

## Sheet: Sheet1
iWAT
	EUG0						EUG100
Tmem26	0.65	1.41	0.25	0.71	1.92	1.05	0.29	0.85	1.59	0.74	0.38	0.53
Cd137	1	1.06	0.76	0.99	1.34	0.86	1.74	3.59	1.62	1.37	1.63	1.45
Tbx1	0.84	1.44	0.97	0.89	1.33	0.54	3.99	1.69	1.33	1.26	4.37	2.33
Ucp1	3.59	1.08	0.02	0.35	0.28	0.68	1.52	7.83	6.72	3.8	1.79	6.6
Prdm16	0.22	2.52	1.64	1.04	0.33	0.24	1.5	4.33	5.78	3.8	1.94	5.06
Pgc1α	ND	0.7	0.13	1.92	1.13	1.12	2.99	3.12	1.37	3.46	1.26	1.7
Dio2	1.39	0.88	0.33	1.12	ND	1.29	2.53	3.51	ND	3.3	3.19	4.87
Cidea	0.25	1.4	0.03	0.69	2.65	0.98	2.8	2.75	3.51	1.62	2.68	2.51
gWAT
	EUG0						EUG100
Tmem26	1.83	0.84	1.35	0.95	0.95	0.07	2.41	3.12	2.26	3.74	1.83	1.33
Cd137	1.27	0.67	0.36	2.98	0.52	0.2	2.04	2.01	0.11	0.24	0.33	ND
Tbx1	0.76	1.18	0.56	2.68	0.74	0.07	4.67	1.4	0.82	0.36	0.21	1.57
Ucp1	0.52	0.28	1.72	1.34	1.22	0.93	5.44	2.22	1.95	3.13	6.04	6.92
Prdm16	1	0.63	0.98	1.48	1.3	0.61	0.95	0.44	0.43	0.31	1.18	0.96
Pgc1α	0.48	1.75	1.58	0.46	0.62	1.12	1.18	0.45	0.21	0.35	1.13	1.46
Dio2	0.68	1.03	1.53	0.71	0.7	1.35	5.32	2.2	2.28	3.92	1.99	6.8
Cidea	0.62	0.63	1.44	1.86	0.32	1.12	9.78	0.81	0.44	2.52	5.24	5
