# Supplementary material for: Eugenol mimics exercise to promote skeletal muscle fiber remodeling and myokine IL-15 expression by activating TRPV1 channel
Source: eLife. 2024 Jun 24;12:RP90724. doi: 10.7554/eLife.90724 (PMC11196110; doi:10.7554/eLife.90724)
Supplement: Figure 4—figure supplement 1—source data 1. [file elife-90724-fig4-figsupp1-data1.xlsx]

## Sheet: Sheet1
	Trpv1	Trpv2	Trpv3	Trpv4	Trpv5	Trpv6	Trpa1
nTPM	5.9	17.1	0	0.1	0	0	0
