# Supplementary material for: Eugenol mimics exercise to promote skeletal muscle fiber remodeling and myokine IL-15 expression by activating TRPV1 channel
Source: eLife. 2024 Jun 24;12:RP90724. doi: 10.7554/eLife.90724 (PMC11196110; doi:10.7554/eLife.90724)
Supplement: Figure 4—figure supplement 1—source data 2. [file elife-90724-fig4-figsupp1-data2.xlsx]

## Sheet: Sheet1
	Trpv1	Trpv2	Trpv3	Trpv4	Trpv5	Trpv6	Trpa1
Control	1.1	ND	ND	0.75	ND	ND	ND
	1.11	2.12	ND	1.24	ND	ND	ND
	0.99	1.19	ND	1.27	ND	ND	ND
	ND	0.25	ND	0.98	ND	ND	ND
	1.14	0.43	ND	1.18	ND	ND	ND
	0.66	4.19	ND	0.57	ND	ND	ND
EUG50	1.87	5.32	ND	3.53	ND	ND	ND
	0.74	3.49	ND	0.11	ND	ND	ND
	0.52	2.99	ND	0.96	ND	ND	ND
	0.7	1.01	ND	1.42	ND	ND	ND
	0.42	1.49	ND	1.96	ND	ND	ND
	1.48	ND	ND	2.87	ND	ND	ND
EUG100	0.57	1.13	ND	0.06	ND	ND	ND
	1.31	1.21	ND	1.09	ND	ND	ND
	1.81	4.22	ND	0.22	ND	ND	ND
	1.53	7.82	ND	0.66	ND	ND	ND
	ND	ND	ND	0.05	ND	ND	ND
	1.79	1.24	ND	1.38	ND	ND	ND
EUG200	4.16	12.23	ND	0.15	ND	ND	ND
	5.15	2.16	ND	1.52	ND	ND	ND
	1.2	12.37	ND	0.27	ND	ND	ND
	1.75	4.11	ND	1.54	ND	ND	ND
	2.63	6.08	ND	0.51	ND	ND	ND
	1.68	ND	ND	0.76	ND	ND	ND
