# Supplementary material for: Eugenol mimics exercise to promote skeletal muscle fiber remodeling and myokine IL-15 expression by activating TRPV1 channel
Source: eLife. 2024 Jun 24;12:RP90724. doi: 10.7554/eLife.90724 (PMC11196110; doi:10.7554/eLife.90724)
Supplement: Figure 4—source data 1. [file elife-90724-fig4-data1.xlsx]

## Sheet: Sheet1
	TRPV1	TRPV2	TRPV3	TRPV4	TRPV5	TRPV6	TRPA1
nTPM	6.6	3.9	1.5	0.3	0	0	0
