# Supplementary material for: Eugenol mimics exercise to promote skeletal muscle fiber remodeling and myokine IL-15 expression by activating TRPV1 channel
Source: eLife. 2024 Jun 24;12:RP90724. doi: 10.7554/eLife.90724 (PMC11196110; doi:10.7554/eLife.90724)
Supplement: Figure 6—source data 1. [file elife-90724-fig6-data1.xlsx]

## Sheet: Sheet1
Mcip1 mRNA expression
0 μM	0.1 μM	0.5 μM	1 μM
1.49	1.45	1.46	3.05
1	2.07	1.36	3.6
1	1.29	1.77	3.15
0.89	1.01	1.98	2.46
0.68	1.93	2.55	2.06
0.94	1.59	2.89	ND
