# Supplementary material for: Eugenol mimics exercise to promote skeletal muscle fiber remodeling and myokine IL-15 expression by activating TRPV1 channel
Source: eLife. 2024 Jun 24;12:RP90724. doi: 10.7554/eLife.90724 (PMC11196110; doi:10.7554/eLife.90724)
Supplement: Figure 6—source data 4. [file elife-90724-fig6-data4.xlsx]

## Sheet: Sheet1
The enzyme activity of CaN (U/mgprpt)
0 μM	0.1 μM	0.5 μM	1 μM
0.12	0.67	0.75	0.36
0.12	0.72	0.62	0.49
0.18	0.74	0.5	0.49
