# Supplementary material for: Eugenol mimics exercise to promote skeletal muscle fiber remodeling and myokine IL-15 expression by activating TRPV1 channel
Source: eLife. 2024 Jun 24;12:RP90724. doi: 10.7554/eLife.90724 (PMC11196110; doi:10.7554/eLife.90724)
Supplement: Figure 6—source data 6. [file elife-90724-fig6-data6.xlsx]

## Sheet: Sheet1
	Control						A23187
	1-1	1-2	1-3	1-4	1-5	1-6	2-1	2-2	2-3	2-4	2-5	2-6
Cx3Cl1	1.07419	1.30443	0.840414	1.06387	0.806007	0.911091	0.567982	0.659887	0.437358	0.44927	0.396032	0.531495
Fgf21	2.22535	2.82391	0.174496	0.222864	0.262377	0.290999	0.94594	1.37043	0.978523	1.20257	1.35935	1.01548
Fndc5	0.773114	0.998729	1.00076	0.984049	1.22074	1.02261	2.20473	1.81333	1.79886	1.8442	1.2802	2.18437
Il6	2.27251	1.84879	0.335523	0.329205	0.607522	0.606452	7.98456	9.14869	3.62003	4.658	1.50118	1.20835
Il8	0.352225	0.383083	1.13483	0.937589	1.96568	1.22659	0.169233	0.579753	0.343366	0.770726	0.823849	1.36599
Il15	0.941956	1.22866	1.00875	0.875103	0.722246	1.22329	3.33524	4.07452	1.48068	1.55623	2.17779	1.85958
Metrnl	1.23448	1.16567	0.733733	0.649837	1.11617	1.10011	1.91065	1.87899	1.46534	1.55792	1.69579	2.29537
Erfe	1.37992	1.76273	0.650919	0.81038	0.770654	0.625402	0.591001	1.07109	0.690109	0.813892	0.788043	1.06977
Nertn	1.775	0.794076	0.593836	0.975733	1.04987	0.811483	1.59526	2.12086	1.00262	2.13927	1.56393	5.13269
