# Supplementary material for: Eugenol mimics exercise to promote skeletal muscle fiber remodeling and myokine IL-15 expression by activating TRPV1 channel
Source: eLife. 2024 Jun 24;12:RP90724. doi: 10.7554/eLife.90724 (PMC11196110; doi:10.7554/eLife.90724)
Supplement: Figure 6—source data 7. [file elife-90724-fig6-data7.xlsx]

## Sheet: Sheet1
	Mcip1	Cx3Cl1	Fgf21	Fndc5	Il6	Il8	Il15	Metrnl	Erfe	Nertn
Sample1	1.49	1.07419	2.22535	0.773114	2.27251	0.352225	0.941956	1.23448	1.37992	1.775
Sample2	1	1.30443	2.82391	0.998729	1.84879	0.383083	1.22866	1.16567	1.76273	0.794076
Sample3	1	0.840414	0.174496	1.00076	0.335523	1.13483	1.00875	0.733733	0.650919	0.593836
Sample4	0.89	1.06387	0.222864	0.984049	0.329205	0.937589	0.875103	0.649837	0.81038	0.975733
Sample5	0.68	0.806007	0.262377	1.22074	0.607522	1.96568	0.722246	1.11617	0.770654	1.04987
Sample6	0.94	0.911091	0.290999	1.02261	0.606452	1.22659	1.22329	1.10011	0.625402	0.811483
Sample7	2.55	0.567982	0.94594	2.20473	7.98456	0.169233	3.33524	1.91065	0.591001	1.59526
Sample8	2.89	0.659887	1.37043	1.81333	9.14869	0.579753	4.07452	1.87899	1.07109	2.12086
Sample9	1.46	0.437358	0.978523	1.79886	3.62003	0.343366	1.48068	1.46534	0.690109	1.00262
Sample10	1.36	0.44927	1.20257	1.8442	4.658	0.770726	1.55623	1.55792	0.813892	2.13927
Sample11	1.98	0.396032	1.35935	1.2802	1.50118	0.823849	2.17779	1.69579	0.788043	1.56393
Sample12	1.77	0.531495	1.01548	2.18437	1.20835	1.36599	1.85958	2.29537	1.06977	5.13269
