# Supplementary material for: Eugenol mimics exercise to promote skeletal muscle fiber remodeling and myokine IL-15 expression by activating TRPV1 channel
Source: eLife. 2024 Jun 24;12:RP90724. doi: 10.7554/eLife.90724 (PMC11196110; doi:10.7554/eLife.90724)
Supplement: Figure 7—figure supplement 1—source data 3. [file elife-90724-fig7-figsupp1-data3.xlsx]

## Sheet: Sheet1
	Myh7	Myh2	Myh1	Myh4
0 μM	1.56	0.84	1.4	1.2
	1.15	0.73	1.19	1.12
	0.74	ND	1.17	0.66
	0.58	ND	0.71	0.89
	1.08	0.91	1.21	0.94
	0.9	1.53	0.33	1.2
0.1 μM	4.04	2.8	1.3	0.67
	5.38	4.06	1.6	0.6
	6.14	3.11	1.39	0.67
	5.67	3.12	1.98	0.23
	5.1	2.34	1.16	0.18
	5.93	3.09	0.88	0.39
0.5 μM	2.93	4.12	0.49	0.63
	5.04	7.63	0.42	0.76
	4.5	5.15	1.07	0.49
	4.22	7.37	1.44	0.56
	2.57	3.47	2.79	0.36
	3.1	2.68	2.01	0.25
1 μM	3.13	4.23	1.11	0.55
	2.63	4.31	1.05	1.2
	3.27	1.62	0.64	0.5
	4.09	ND	0.47	0.74
	1.44	3.48	0.31	0.46
	1.37	5.61	0.72	0.07
