# Supplementary material for: Eugenol mimics exercise to promote skeletal muscle fiber remodeling and myokine IL-15 expression by activating TRPV1 channel
Source: eLife. 2024 Jun 24;12:RP90724. doi: 10.7554/eLife.90724 (PMC11196110; doi:10.7554/eLife.90724)
Supplement: Figure 7—source data 13. [file elife-90724-fig7-data13.xlsx]

## Sheet: Sheet1
	The ratio between firefly luciferase intensity and renilla luciferase intensity
pcDNA3.1 + pGL3	1.21876	0.8792	1.02031	0.49096	0.5811	1.80967
pcDNA3.1-NFATc1 + pGL3	1.04067	1.67668	0.88631	1.50073	1.57801	1.31267
pcDNA3.1 + pGL3-IL15	1.96474	1.56474	1.2316	1.62745	1.5621	1.71215
pcDNA3.1-NFATc1 + pGL3-IL15	3.65009	2.10915	3.84727	2.41378	2.10508	2.58328
