# Supplementary material for: Eugenol mimics exercise to promote skeletal muscle fiber remodeling and myokine IL-15 expression by activating TRPV1 channel
Source: eLife. 2024 Jun 24;12:RP90724. doi: 10.7554/eLife.90724 (PMC11196110; doi:10.7554/eLife.90724)
Supplement: Figure 8—source data 1. [file elife-90724-fig8-data1.xlsx]

## Sheet: Sheet1
GAS muscle				TA muscle
Control	EUG50	EUG100	EUG200	Control	EUG50	EUG100	EUG200
1.14	1.06	1.8	0.39	1.28	1.29	1.28	1.54
0.86	0.75	3.18	ND	0.5	1.53	1.81	1.57
1.08	1	2.65	0.38	0.99	1.34	1.73	1.29
1.43	0.77	4.96	2.45	1.23	0.9	ND	1.92
1.01	2.12	1.25	0.71	1.31	1.27	1.6	1.25
0.48	1.71	2.13	0.71	0.69	0.83	ND	1.57
