# Supplementary material for: Eugenol mimics exercise to promote skeletal muscle fiber remodeling and myokine IL-15 expression by activating TRPV1 channel
Source: eLife. 2024 Jun 24;12:RP90724. doi: 10.7554/eLife.90724 (PMC11196110; doi:10.7554/eLife.90724)
Supplement: Figure 8—source data 6. [file elife-90724-fig8-data6.xlsx]

## Sheet: The mRNA expression
Myh7 mRNA expression					Myh2 mRNA expression
EDL muscle		SOL muscle			EDL muscle		SOL muscle
Control	EUG100	Control	EUG100		Control	EUG100	Control	EUG100
0.899382	0.842396	173.069	245.909		0.821276	2.10595	36.013	55.1086
0.926278	0.75211	229.524	255.161		0.696548	1.36309	36.9971	62.073
0.974367	0.730949	226.987	307.034		0.790957	1.69575	51.5688	68.6968
1.1055	0.675116	246.992	379.695		1.21408	1.37	49.5328	59.1299
1.09447	1.34682	230.673	474.002		1.47714	1.59808	53.0368	40.854
0.961638	1.80248	233.707	382.522		1.22814	1.81094	42.0705	90.5046
Myh4 mRNA expression					Il15 mRNA expression
EDL muscle		SOL muscle			EDL muscle		SOL muscle
Control	EUG100	Control	EUG100		Control	EUG100	Control	EUG100
0.743103	1.04533	0.0355	0.02243		1.08326	1.46159	1.25287	1.99383
0.962101	0.983839	0.043263	0.020031		0.907651	1.50761	1.57271	1.91292
0.882073	0.990156	0.047936	0.017152		1.00213	1.20833	1.37949	1.82712
1.17946	0.795376	0.045563	0.015374		0.974978	1.11428	1.29874	1.50629
1.23326	1.02218	0.04553	0.013871		1.03198	1.16441	1.66671	2.00827
0.765237	1.24737	0.040689	0.019792		1.02958	1.55096	1.35992	3.16155

## Sheet:  Correlation analysis
	Il15	Myh7	Myh2	Myh4
Sample1	1.08326	0.899382	0.821276	0.743103
Sample2	0.907651	0.926278	0.696548	0.962101
Sample3	1.00213	0.974367	0.790957	0.882073
Sample4	0.974978	1.1055	1.21408	1.17946
Sample5	1.03198	1.09447	1.47714	1.23326
Sample6	1.02958	0.961638	1.22814	0.765237
Sample7	1.46159	0.842396	2.10595	1.04532
Sample8	1.50761	0.75211	1.36309	0.983839
Sample9	1.20833	0.730949	1.69575	0.990156
Sample10	1.11428	0.675116	1.37	0.795376
Sample11	1.16441	1.34682	1.59808	1.02218
Sample12	1.55096	1.80248	1.81094	1.24737
Sample13	1.25287	173.069	36.013	0.0354996
Sample14	1.57271	229.524	36.9971	0.0432634
Sample15	1.37949	226.987	51.5688	0.0479359
Sample16	1.29874	246.992	49.5328	0.0455632
Sample17	1.66671	230.673	53.0368	0.0455295
Sample18	1.35992	233.707	42.0705	0.0406894
Sample19	1.99383	245.909	55.1086	0.0224301
Sample20	1.91292	255.161	62.073	0.0200306
Sample21	1.82712	307.034	68.6968	0.017152
Sample22	1.50629	379.695	59.1299	0.0153744
Sample23	2.00827	474.002	40.854	0.0138709
Sample24	3.16155	382.522	90.5046	0.0197923
