# Supplementary material for: Eugenol mimics exercise to promote skeletal muscle fiber remodeling and myokine IL-15 expression by activating TRPV1 channel
Source: eLife. 2024 Jun 24;12:RP90724. doi: 10.7554/eLife.90724 (PMC11196110; doi:10.7554/eLife.90724)
Supplement: Figure 8—source data 9. [file elife-90724-fig8-data9.xlsx]

## Sheet: Sheet1
Serum IL-15 (pg/ml)
Control	EUG50	EUG100	EUG200
11.2276	14.4797	16.1626	11.5772
12.1301	15.0163	15.4228	10.7155
13.5041	14.1463	17	13.8049
12.3089	15.6667	16.8374	12.7967
14.5285	14.4309	16.3252	12.8943
13.122	14.8293	15.9106	12.6423
13.2033	13.4715	16.8293	12.8618
14.9756	15.7073	17.6748	15.3008
