# Supplementary material for: Eugenol mimics exercise to promote skeletal muscle fiber remodeling and myokine IL-15 expression by activating TRPV1 channel
Source: eLife. 2024 Jun 24;12:RP90724. doi: 10.7554/eLife.90724 (PMC11196110; doi:10.7554/eLife.90724)
Supplement: Figure 9—source data 1. [file elife-90724-fig9-data1.xlsx]

## Sheet: Sheet1
0 μM	12.5 μM	25 μM	50 μM	100 μM	200 μM
1	0.955271	1.40867	1.63363	1.19968	1.09196
1.23749	1.73175	1.53861	1.42001	1.1343	0.833611
1	0.835331	1.38258	1.17631	1.2094	1.04868
1.16133	1.76016	1.52487	1.24311	1.17871	0.811281
