# Supplementary material for: Eugenol mimics exercise to promote skeletal muscle fiber remodeling and myokine IL-15 expression by activating TRPV1 channel
Source: eLife. 2024 Jun 24;12:RP90724. doi: 10.7554/eLife.90724 (PMC11196110; doi:10.7554/eLife.90724)
Supplement: Figure 9—source data 4. [file elife-90724-fig9-data4.xlsx]

## Sheet: Sheet1
Control	EUG	EUG+AMG-517	EUG+CsA	AMG-517	CsA
0.52	2.88	0.27	1.46	2.77	0.36
1.6	2.41	1.65	1.76	1.62	0.24
1.11	2.91	2.34	1.2	1.13	0.72
0.76	1.83	0.7	1.19	1.01	0.29
