# Supplementary material for: Eugenol mimics exercise to promote skeletal muscle fiber remodeling and myokine IL-15 expression by activating TRPV1 channel
Source: eLife. 2024 Jun 24;12:RP90724. doi: 10.7554/eLife.90724 (PMC11196110; doi:10.7554/eLife.90724)
Supplement: Supplementary file 1. [file elife-90724-supp1.docx]

**Primers used for real-time quantitative PCR.**

| Gene name |  | Primer Sequence (5'-3') | GeneBank ID | Product size |
| --- | --- | --- | --- | --- |
| *36b4* | Forward | ACAGATTTGTCAAGCGCATC | NM_007475.5 | 76 |
| Reverse | TTCCACAGGCCGATAGTAAGCA |
| *Acc* | Forward | ACCTGTGTGGTGGAATTTCAGT | NM_133360.3 | 79 |
| Reverse | ACATTCTGTTTAGCGTGGGGA |
| *Atp5a1* | Forward | CATTGGTGATGGTATTGCGC | NM_007505.2 | 134 |
| Reverse | TCCCAAACACGACAACTCC |
| *Atp5b* | Forward | GAGGGCAATGATTTATACCAT | NM_016774.3 | 92 |
| Reverse | ATCTGTCCATATACCAACGCTA |
| *Atp5g1* | Forward | GGAGTGGGAGTGCAGATTGAA | NM_001161419.1 | 136 |
| Reverse | TTAGATGGGGCCTCTGGTCT |
| *Cd36* | Forward | TGTGATCGGAACTGTGGGC | XM_030254088.1 | 80 |
| Reverse | ACTGGCATGAGAATGCCTCC |
| *Cd137* | Forward | AGTTTTGCTCCTCTACCCACA | NM_001077509.1 | 177 |
| Reverse | GACAGACGCCAGTACCGTTC |  |
| *Cidea* | Forward | AGCAACCAAAGAAATCGGGAA | NM_007702.2 | 108 |
| Reverse | ACATCTCGTACATCGTGGCTT |  |
| *Cox5b* | Forward | ACCCTAATCTAGTCCCGTCC | NM_009942.2 | 89 |
| Reverse | CAGCCAAAACCAGATGACAG |
| *Cox6a1* | Forward | CATCAGGACCAAGCCCTTC | NM_007748.5 | 95 |
| Reverse | ACTCATCTTCATAGCCGGTCG |
| *Cox7a* | Forward | AAGCCACTTAGAAAACCGTGT | NM_001412271.1 | 163 |
| Reverse | CCAGCCCAAGCAGTATAAGCA |
| *Cx3cl1* | Forward | CCTGACAAAGCCTGAATCCG | NM_009142.3 | 192 |
|  | Reverse | GCCTCAAAACTTCCAATGCTCT |  |  |
| *Dio2* | Forward | GTGAAGATGCTCCCAATTCCA | NM_010050.4 | 69 |
| Reverse | CCGAGGCATAATTGTTACCTG |  |
| *Fabp4* | Forward | TTCCTTCAAACTGGGCGTGG | NM_001409513.1 | 125 |
| Reverse | TTGTGGTCGACTTTCCATCCC |
| *Fasn* | Forward | GAAGAGCCTGGAAGATCGGG | XM_030245556.1 | 108 |
| Reverse | TTGTGGTAGAAGGACACGGC |
| *Fgf21* | Forward | CCTCTACACAGATGACGACCA | NM_020013.4 | 160 |
|  | Reverse | AAACCTAGAGGCTTTGACACC |  |  |
| *Fndc5* | Forward | ATGAAGGAGATGGGGAGGAA | NM_027402.4 | 102 |
|  | Reverse | GCGGCAGAAGAGAGCTATAACA |  |  |
| *Gapdh* | Forward | AGGGCATCTTGGGCTACAC | NM_008084 | 211 |
| Reverse | TGGTCCAGGGTTTCTTACTCC |
| *Hsl* | Forward | GGAGCACTACAAACGCAACG | XM_030242180.1 | 108 |
| Reverse | CGTTCAAATTCAGCCCCACG |
| *Il6* | Forward | CCTCTCTCTGCAAGAGACTTCCAT | NM_031168.2 | 81 |
|  | Reverse | TTGTGAAGTAGGGAAGGCCG |  |  |
| *Il8* | Forward | TGGCCCAATTACTAACAGGT | NM_011339.2 | 225 |
|  | Reverse | ACTTCACTGGAGTCCCGTA |  |  |
| *Il13* | Forward | TGGCTCTTGCTTGCCTTGGTGG | NM_008355.3 | 146 |
| Reverse | CCATACCATGCTGCCGTTGCA |
| *Il15* | Forward | TAGCCAGCTCATCTTCAACA | NM_001254747.1 | 104 |
| Reverse | GAAACACAAGTAGCACGAGA |
| *Mcip1* | Forward | CCGTTGGCTGGAAACAAG | NM_019466 | 153 |
| Reverse | GGTCACTCTCACACACGTGG |
| *Metrnl* | Forward | CACCCCAACAGGACATCAGC | NM_144797.3 | 172 |
|  | Reverse | TCCTCAATGAAGCCTCGGACA |  |  |
| *Erfe* | Forward | CGCATTCCACTGTCGCTTG | NM_173395.2 | 96 |
| Reverse | AAGGCTCCCTCAACTTCGG |
| *Myh7* | Forward | CTTCTACAGGCCTGGGCTTAC | NM_080728 | 128 |
| Reverse | CTCCTTCTCAGACTTCCGCAG |
| *Myh2* | Forward | TTCCAGAAGCCTAAGGTGGTC | NM_001039545 | 94 |
| Reverse | GCCAGCCAGTGATGTTGTAAT |
| *Myh1* | Forward | CAACCCATACGACTACGCCT | NM_030679 | 119 |
| Reverse | CATCAGAAGTGAAGCCCAGAAT |
| *Myh4* | Forward | CTTGTCTGACTCAAGCCTGCC | NM_010855 | 158 |
| Reverse | TCGCTCCTTTTCAGACTTCCG |
| *Nd1* | Forward | AATCGCCATAGCCTTCCTAA | NC_005089.1 | 114 |
| Reverse | GCGTCTGCAAATGGTTGTAA |
| *Ndufa1* | Forward | GTCAATCGCTACTATGTGTCC | NM_019443.2 | 117 |
| Reverse | TGCATAGCCTTCTAACAGGA |
| *Ndufb3* | Forward | GCAACATCACCTTCCCGAGT | NM_025597.3 | 70 |
| Reverse | AAAGCTACCACAAACGCAGCA |
| *Ndufs8* | Forward | GTTCATAGGGTCAGAGGTCAAG | NM_001271444.1 | 112 |
| Reverse | TCCATTAAGATGTCCTGTGCG |
| *Nrtn* | Forward | GGGCTACACGTCGGATGAG | NM_008738.3 | 80 |
| Reverse | CCAGGTCGTAGATGCGGATG |
| *Nrf1* | Forward | TGCTTCAGAACTGCCAACCA | NM_001410232.1 | 105 |
| Reverse | ATTTCACCGCCCTGTAACGT |
| *Nrf2* | Forward | AAAGCACAGCCAGCACATTC | NM_010902 | 86 |
| Reverse | TGGGATTCACGCATAGGAGC |
| *Pgc1α* | Forward | CCAGTACAACAATGAGCCTGC | NM_001271444.1 | 118 |
| Reverse | CAATCCGTCTTCATCCACG |
| *Polrmt* | Forward | TTGACCAGCAGAAGCAAGCC | NM_001407795.1 | 135 |
| Reverse | GCTGCTTTTCCTCTGAGTTCGT |
| *Pparg* | Forward | TGCGATCAAAGTAGAACCTG | NM 001127330.2 | 231 |
| Reverse | CGGCAGTTAAGATCACACC |  |
| *Prdm16* | Forward | CCCTGACTGTGGCAAGACCTT | [NM_027504.3](https://www.ncbi.nlm.nih.gov/entrez/viewer.fcgi?db=nucleotide&id=124107622) | 101 |
| Reverse | ACTTGTGGCAGACCTCGCAT |  |
| *Sdha* | Forward | CCACTCACTCTTACACACGTT | NM_023281.1 | 89 |
| Reverse | CCATCAGAAGATCCAGTGCAA |
| *Sdhb* | Forward | ACCCCTTCTCTGTCTACCG | NM_001355515.1 | 130 |
| Reverse | AATGCTCGCTTCTCCTTGTAG |
| *Sdhc* | Forward | TCTTCCCGCTCATGTACCAC | NM_025321.3 | 52 |
| Reverse | TCCCATAGCAAGTGTCGGAT |
| *Tbx1* | Forward | GAAACTGACCAATAACCTGCT | NM_011532.2 | 114 |
| Reverse | TTCTCACTGTCTTTTCGAGGG |  |
| *Tfam* | Forward | ATTTCACCGCCCTGTAACGT | NM_009360 | 193 |
| Reverse | TCGTTTCACACTTCGACGGAT |
| *Tfb1m* | Forward | GAAGCACAACGCCTCGAAAG | NM_146074 | 91 |
| Reverse | AATGCATGAGCGAGAGGTGG |
| *Tfb2m* | Forward | CCAATAATACGCCATTTACGTT | NM_001331055.1 | 178 |
| Reverse | GGCAGTAGTCATAGATCCAC |
| *Tmem26* | Forward | GCACCATCACTAGAGACCAAC | NM_177794.3 | 53 |
| Reverse | CGTCCCCACAAACATCAGA |
| *Trpa1* | Forward | TGGTTATGGAAATACCCCACT | NM_177781.5 | 111 |
| Reverse | ATCATGTTTCTATTTCGGAGG |
| *Trpv1* | Forward | ACAGATTTGTCAAGCGCATC | NM_001001445.2 | 95 |
| Reverse | TTCCACAGGCCGATAGTAAGCA |
| *Trpv2* | Forward | TTTTAGAGCCACTGAACAAGC | NM_011706.2 | 88 |
| Reverse | TAGACCAAGTAACAGGCGAA |
| *Trpv3* | Forward | TCTGTGCTGGAAATCATCGTCT | NM_145099.3 | 59 |
| Reverse | GTCAGCATCTCATGTCGGTT |
| *Trpv4* | Forward | CAACCAGCCGCACATCGTC | NM_022017.3 | 69 |
| Reverse | TCCTGTCGCCTCATGTCAGC |
| *Trpv5* | Forward | AGTTCCGAGATGCCAACCGTA | NM_001007572.2 | 119 |
| Reverse | TGTCACCAACTCCCCGACCA |
| *Trpv6* | Forward | AAGCCCAGGACCAATAACCG | NM_022413.4 | 195 |
| Reverse | TCCAAAGAAGCGAGTGACCC |
| *Ucp1* | Forward | AAACACCTGCCTCTCTCGGAA | NM_009463.3 | 70 |
| Reverse | CCAATGAACACTGCCACACCT |  |
| *Uqcrb* | Forward | TGCCTCATAGTCAGGTCCA | NM_026219.2 | 126 |
| Reverse | GTTAATGCGAGATGATACACT |
| *Uqcrc1* | Forward | ATCAAGGCACTGTCCAAGG | NM_025407.2 | 131 |
| Reverse | TCATTTTCCTGCATCTCCCG |
| *Uqcrq* | Forward | CTGATCTACACATGGGGCAAC | NM_025352.3 | 56 |
| Reverse | GCTGGATTCTTCCTTTTCGACT |
